# Supplementary material for: Two-dimensional metal–organic TMTAP monolayers as a promising class of monoatomic electrocatalysts for oxygen reduction, oxygen evolution, and hydrogen evolution reactions
Source: Royal Society of Chemistry journal article supplement (doi:10.1039/d6ra03135h), 2026-06-04
Supplement: d6ra03135h1.pdf [file d6ra03135h1.pdf]

## Supporting Information

# Two-Dimensional Metal-Organic TMTAP Monolayers as a Promising Class of Monoatomic Electrocatalysts for Oxygen Reduction, Oxygen Evolution, and Hydrogen Evolution Reactions

Debing Long, Xunyu Yang, Zihao Cheng, and Shan Peng\*

*School of Physics and Electronic-Information Engineering, Hubei Engineering University, Xiaogan, 432000, P. R. China. (email: pengshan@hbeu.edu.cn)*

**Table S1.** The relaxed geometric structure, lattice parameter ( $\text{\AA}$ ), TM–N bond length ( $\text{\AA}$ ), magnetic moment of TM atom ( $\mu_B$ ), and total magnetic moment ( $\mu_B$ ) for 30 TMTAP monolayers.

| TMTA<br>P | Geometric<br>structure                                                              | Lattice<br>parameter | TM–N bond<br>length | Magnetic<br>moment of TM | Total magnetic<br>moment |
|-----------|-------------------------------------------------------------------------------------|----------------------|---------------------|--------------------------|--------------------------|
| Sc        | 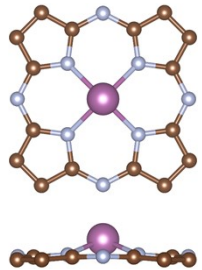  | 8.34                 | 2.11                | 0.36                     | 0.59                     |
| Ti        |  | 8.34                 | 2.04                | 1.39                     | 1.63                     |
| V         |  | 8.33                 | 1.99                | 2.51                     | 2.68                     |
| Cr        |  | 8.32                 | 1.99                | 3.49                     | 3.84                     |

|    |                                                                                     |      |      |      |      |
|----|-------------------------------------------------------------------------------------|------|------|------|------|
| Mn | 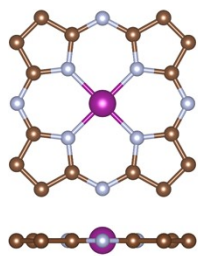   | 8.29 | 1.96 | 2.73 | 3.03 |
| Fe |    | 8.27 | 1.93 | 1.72 | 2.00 |
| Co |    | 8.24 | 1.91 | 0.55 | 0.63 |
| Ni |   | 8.26 | 1.93 | 0.16 | 0.21 |
| Cu |  | 8.30 | 1.98 | 0.43 | 0.68 |
| Zn |  | 8.33 | 2.00 | 0    | 0    |
| Y  |  | 8.34 | 2.25 | 0.19 | 0.57 |

|    |                                                                                     |      |      |      |      |
|----|-------------------------------------------------------------------------------------|------|------|------|------|
|    | 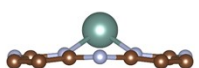   |      |      |      |      |
| Zr |    | 8.34 | 2.16 | 0.81 | 1.58 |
| Nb |    | 8.35 | 2.08 | 1.62 | 2.54 |
| Mo |   | 8.38 | 2.05 | 2.94 | 3.64 |
| Tc |  | 8.35 | 2.02 | 2.20 | 2.74 |
| Ru |  | 8.31 | 1.98 | 0.32 | 0.34 |
| Rh |  | 8.30 | 1.98 | 0    | 0    |

|    |                                                                                     |      |      |      |      |
|----|-------------------------------------------------------------------------------------|------|------|------|------|
| Pd | 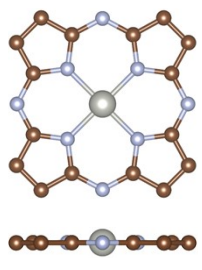   | 8.31 | 1.99 | 0    | 0    |
| Ag |    | 8.38 | 2.06 | 0.42 | 0.89 |
| Cd |    | 8.37 | 2.16 | 0    | 0    |
| Lu |   | 8.34 | 2.21 | 0.15 | 0.60 |
| Hf |  | 8.35 | 2.11 | 0.67 | 1.11 |
| Ta |  | 8.35 | 2.07 | 1.77 | 2.23 |

|    |                                                                                     |      |      |      |      |
|----|-------------------------------------------------------------------------------------|------|------|------|------|
| W  | 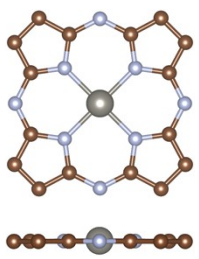   | 8.38 | 2.04 | 2.73 | 3.58 |
| Re |    | 8.36 | 2.02 | 1.94 | 2.64 |
| Os |    | 8.31 | 1.98 | 0    | 0    |
| Ir |   | 8.31 | 1.98 | 0    | 0    |
| Pt |  | 8.32 | 2.00 | 0    | 0    |
| Au |  | 8.37 | 2.05 | 0.31 | 0.64 |
| Hg |  | 8.45 | 2.13 | 0    | 0    |

**Table S2.** Calculated binding energies ( $E_b$ ), cohesive energies ( $E_c^{calc.}$ ), cluster energies ( $E_{clus} = E_b + E_c$ ), and dissolution potentials of TM atoms ( $U_{diss}$ ), number of transferred electrons during the dissolution ( $n$ ). For comparison, the experimental cohesive energies ( $E_c^{exp.}$ ) and standard dissolution potential ( $U_{diss}^o$ ) of bulk metal are also listed.

| TM | $E_b$ (eV) | $E_c^{exp.}$ (eV) | $E_c^{calc.}$ (eV) | $E_{clus}$ (eV) | $n$ | $U_{diss}^o$ (V) | $U_{diss}$ (V) |
|----|------------|-------------------|--------------------|-----------------|-----|------------------|----------------|
| Sc | -8.76      | 3.90              | 4.36               | -4.40           | 3   | -2.08            | -0.61          |
| Ti | -9.13      | 4.90              | 5.5                | -3.63           | 2   | -1.63            | 0.19           |
| V  | -8.50      | 5.30              | 5.4                | -3.10           | 2   | -1.18            | 0.37           |
| Cr | -7.34      | 4.10              | 4.05               | -3.29           | 2   | -0.91            | 0.73           |
| Mn | -6.82      | 2.90              | 3.29               | -3.53           | 2   | -1.19            | 0.57           |
| Fe | -7.52      | 4.30              | 4.63               | -2.89           | 2   | -0.45            | 0.99           |
| Co | -8.12      | 4.40              | 5.09               | -3.03           | 2   | -0.28            | 1.23           |
| Ni | -7.44      | 4.40              | 4.74               | -2.70           | 2   | -0.26            | 1.09           |
| Cu | -5.38      | 3.50              | 3.49               | -1.89           | 2   | 0.34             | 1.29           |
| Zn | -3.98      | 1.40              | 1.17               | -2.81           | 2   | -0.76            | 0.65           |
| Y  | -8.53      | 4.40              | 4.28               | -4.25           | 3   | -2.37            | -0.95          |
| Zr | -9.31      | 6.30              | 6.27               | -3.04           | 4   | -1.45            | -0.69          |
| Nb | -8.61      | 7.60              | 7.02               | -1.59           | 3   | -1.10            | -0.57          |
| Mo | -7.30      | 6.80              | 6.36               | -0.94           | 3   | -0.20            | 0.11           |
| Tc | -8.06      | 6.90              | 7.07               | -0.99           | 2   | 0.30             | 0.79           |
| Ru | -8.47      | 6.70              | 7.03               | -1.44           | 2   | 0.46             | 1.18           |
| Rh | -8.33      | 5.80              | 5.98               | -2.35           | 2   | 0.60             | 1.77           |
| Pd | -6.12      | 3.90              | 3.74               | -2.38           | 2   | 0.95             | 2.14           |
| Ag | -3.08      | 3.00              | 2.82               | -0.26           | 1   | 0.80             | 1.06           |
| Cd | -2.21      | 1.20              | 0.94               | -1.27           | 2   | -0.40            | 0.23           |
| Lu | -8.38      | 4.43              | 4.32               | -4.06           | 3   | -2.28            | -0.93          |
| Hf | -9.75      | 6.40              | 6.79               | -2.96           | 4   | -1.55            | -0.81          |
| Ta | -9.68      | 8.10              | 8.47               | -1.21           | 3   | -0.60            | -0.20          |
| W  | -8.61      | 8.90              | 8.49               | -0.12           | 3   | 0.10             | 0.14           |

|    |       |      |      |       |   |      |      |
|----|-------|------|------|-------|---|------|------|
| Re | -7.76 | 8.00 | 7.82 | 0.06  | 3 | 0.30 | 0.28 |
| Os | -9.06 | 8.20 | 8.43 | -0.63 | 8 | 0.84 | 0.92 |
| Ir | -9.42 | 6.90 | 7.56 | -1.86 | 3 | 1.16 | 1.78 |
| Pt | -8.20 | 5.80 | 5.72 | -2.48 | 2 | 1.18 | 2.42 |
| Au | -3.44 | 3.80 | 3.46 | 0.02  | 3 | 1.50 | 1.49 |
| Hg | -0.26 | 0.70 | 0.58 | 0.32  | 2 | 0.85 | 0.69 |

<sup>a)</sup>Experimental cohesive energy values are taken from ref. 1 [1].

<sup>b)</sup>Standard dissolution potential values are taken from ref. 2 [2].

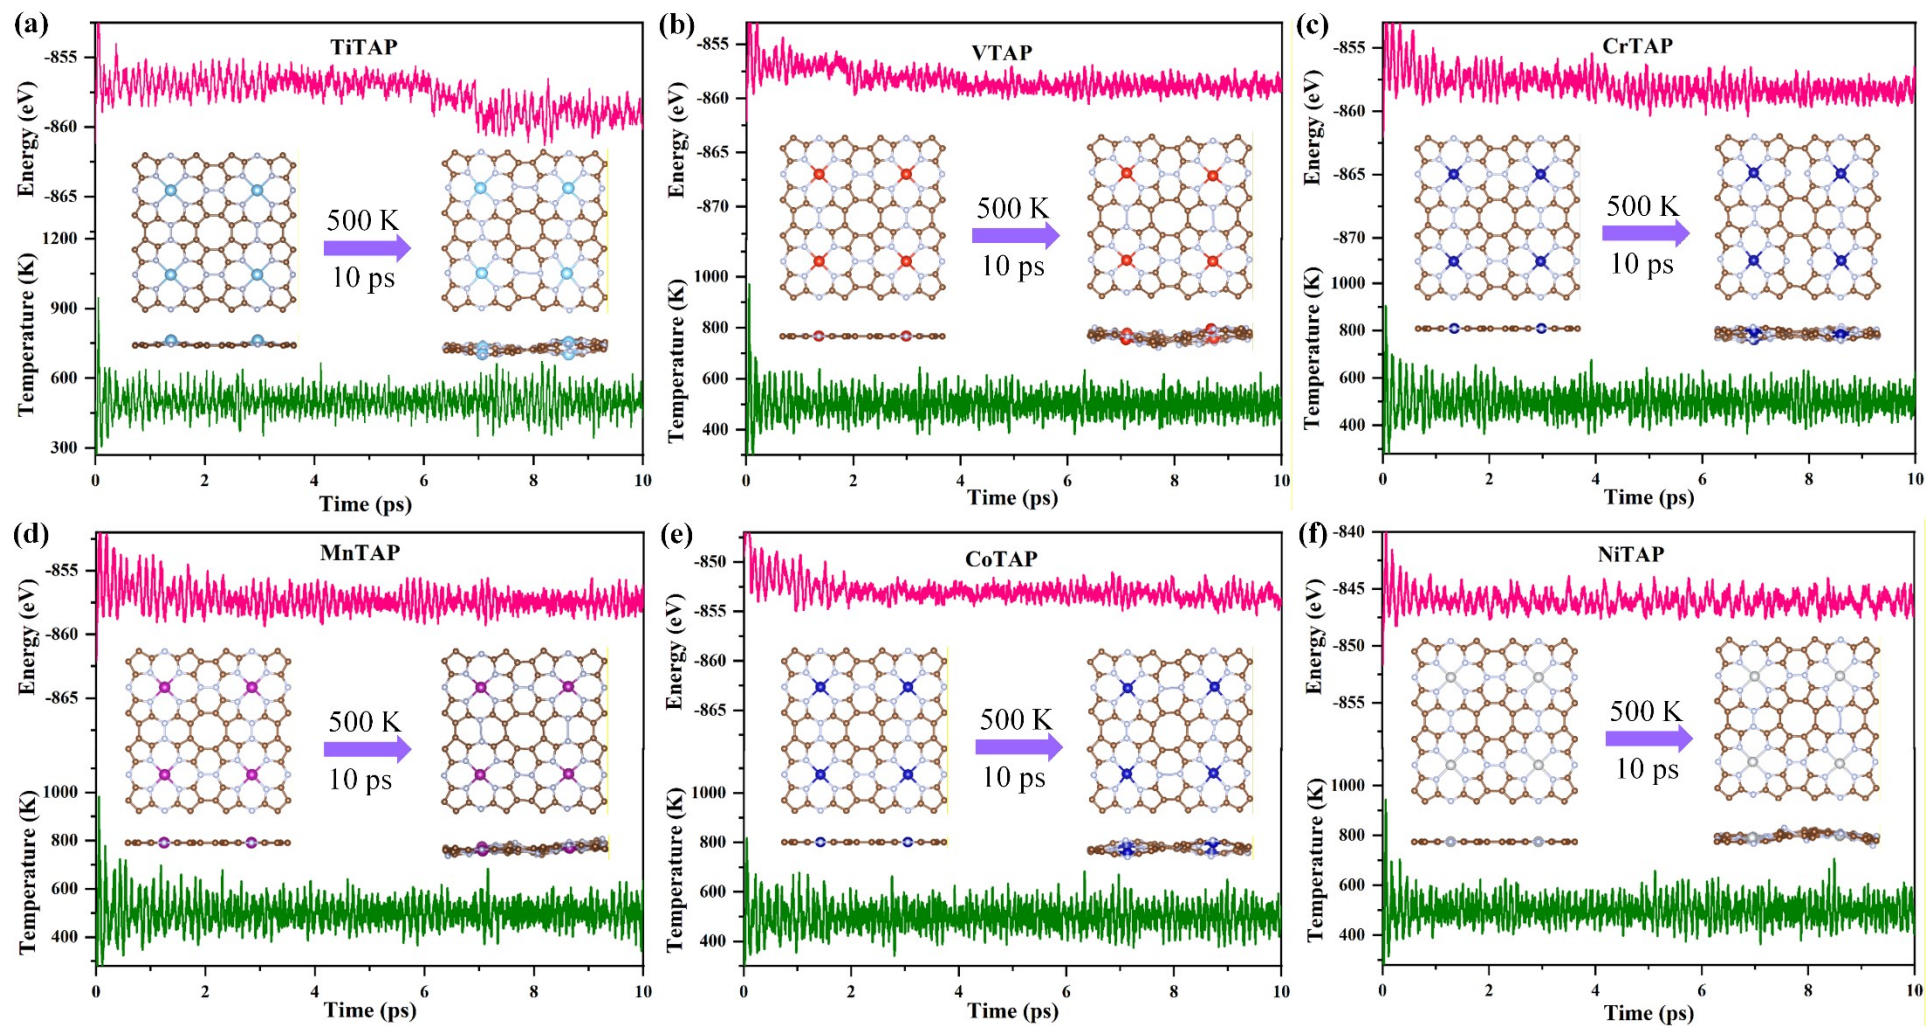

**Figure S1.** Evolution of the temperatures and total energies of AIMD simulations for (a) TiTAP, (b) VTAP, (c) CrTAP, (d) MnTAP, (e) CoTAP, and (f) NiTAP at 500 K for 10 ps with a time step of 2 fs. The illustrations are snapshots of the initial and final frame during AIMD simulations.

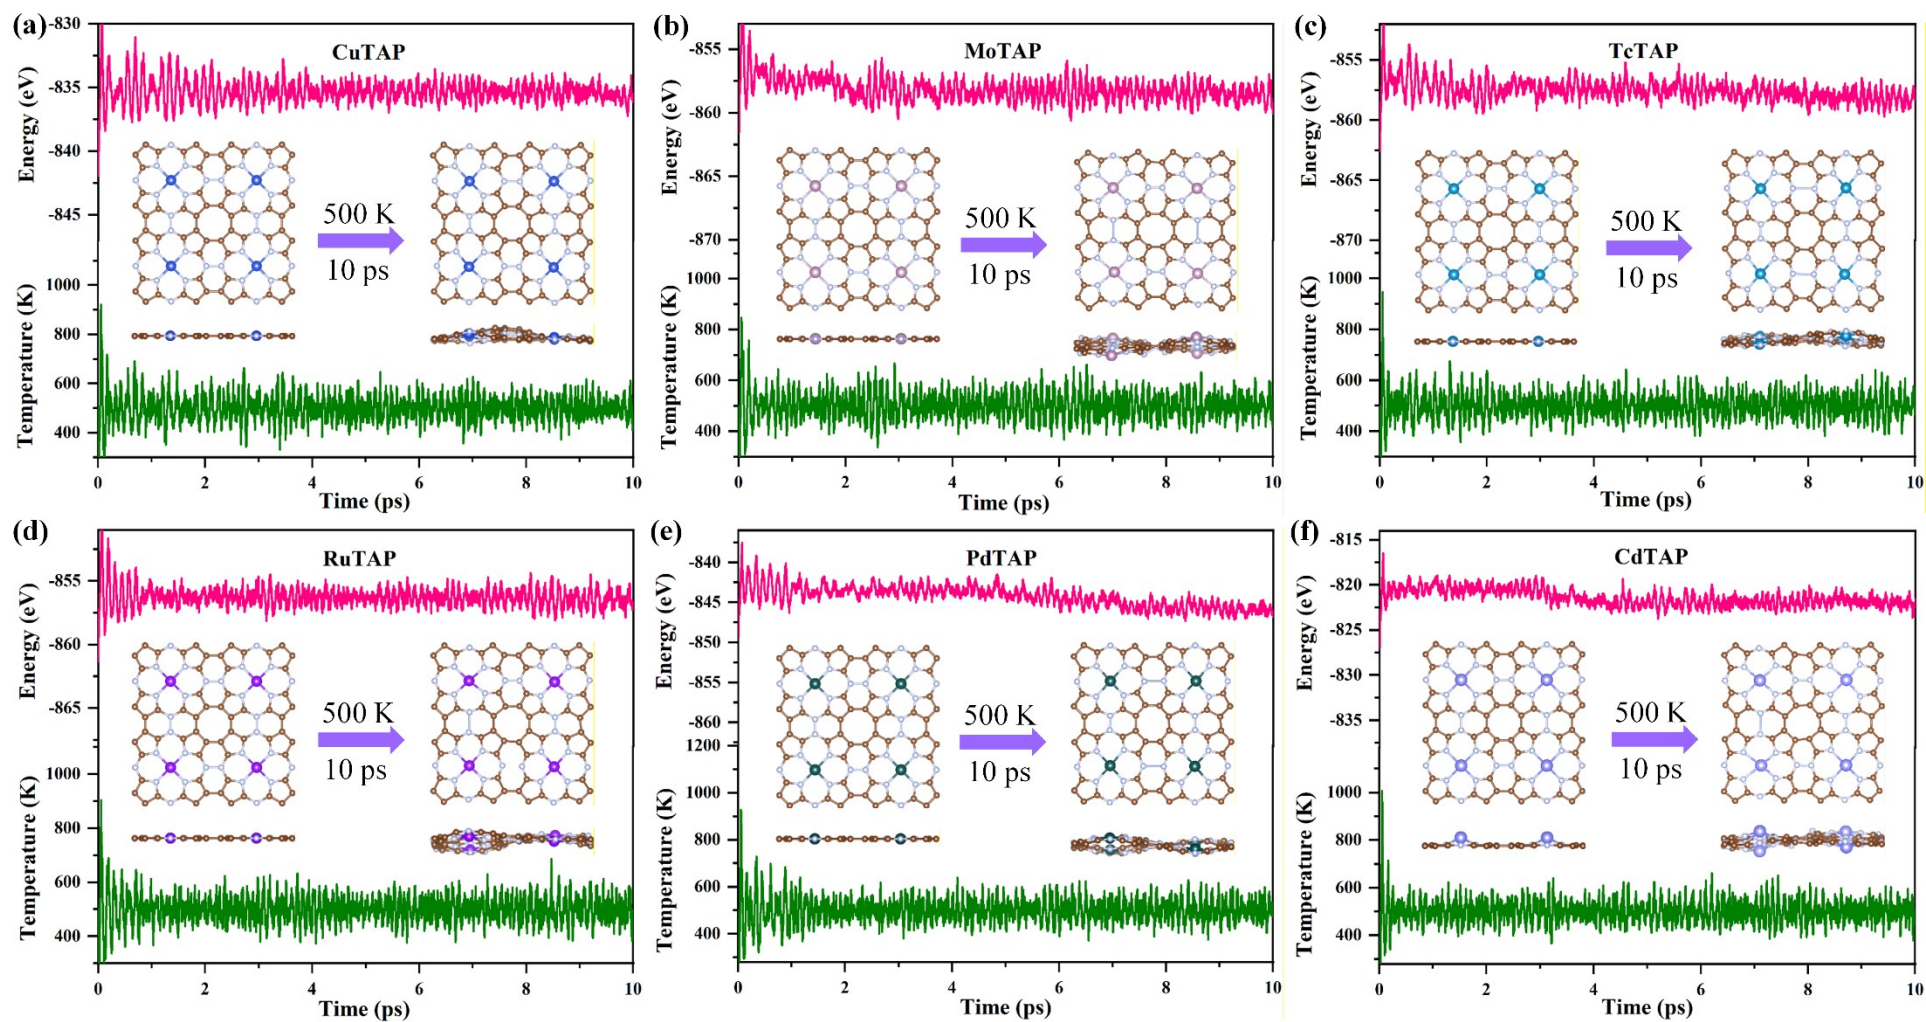

**Figure S2.** Evolution of the temperatures and total energies of AIMD simulations for (a) CuTAP, (b) MoTAP, (c) TcTAP, (d) RuTAP, (e) PdTAP, and (f) CdTAP at 500 K for 10 ps with a time step of 2 fs. The illustrations are snapshots of the initial and final frame during AIMD simulations.

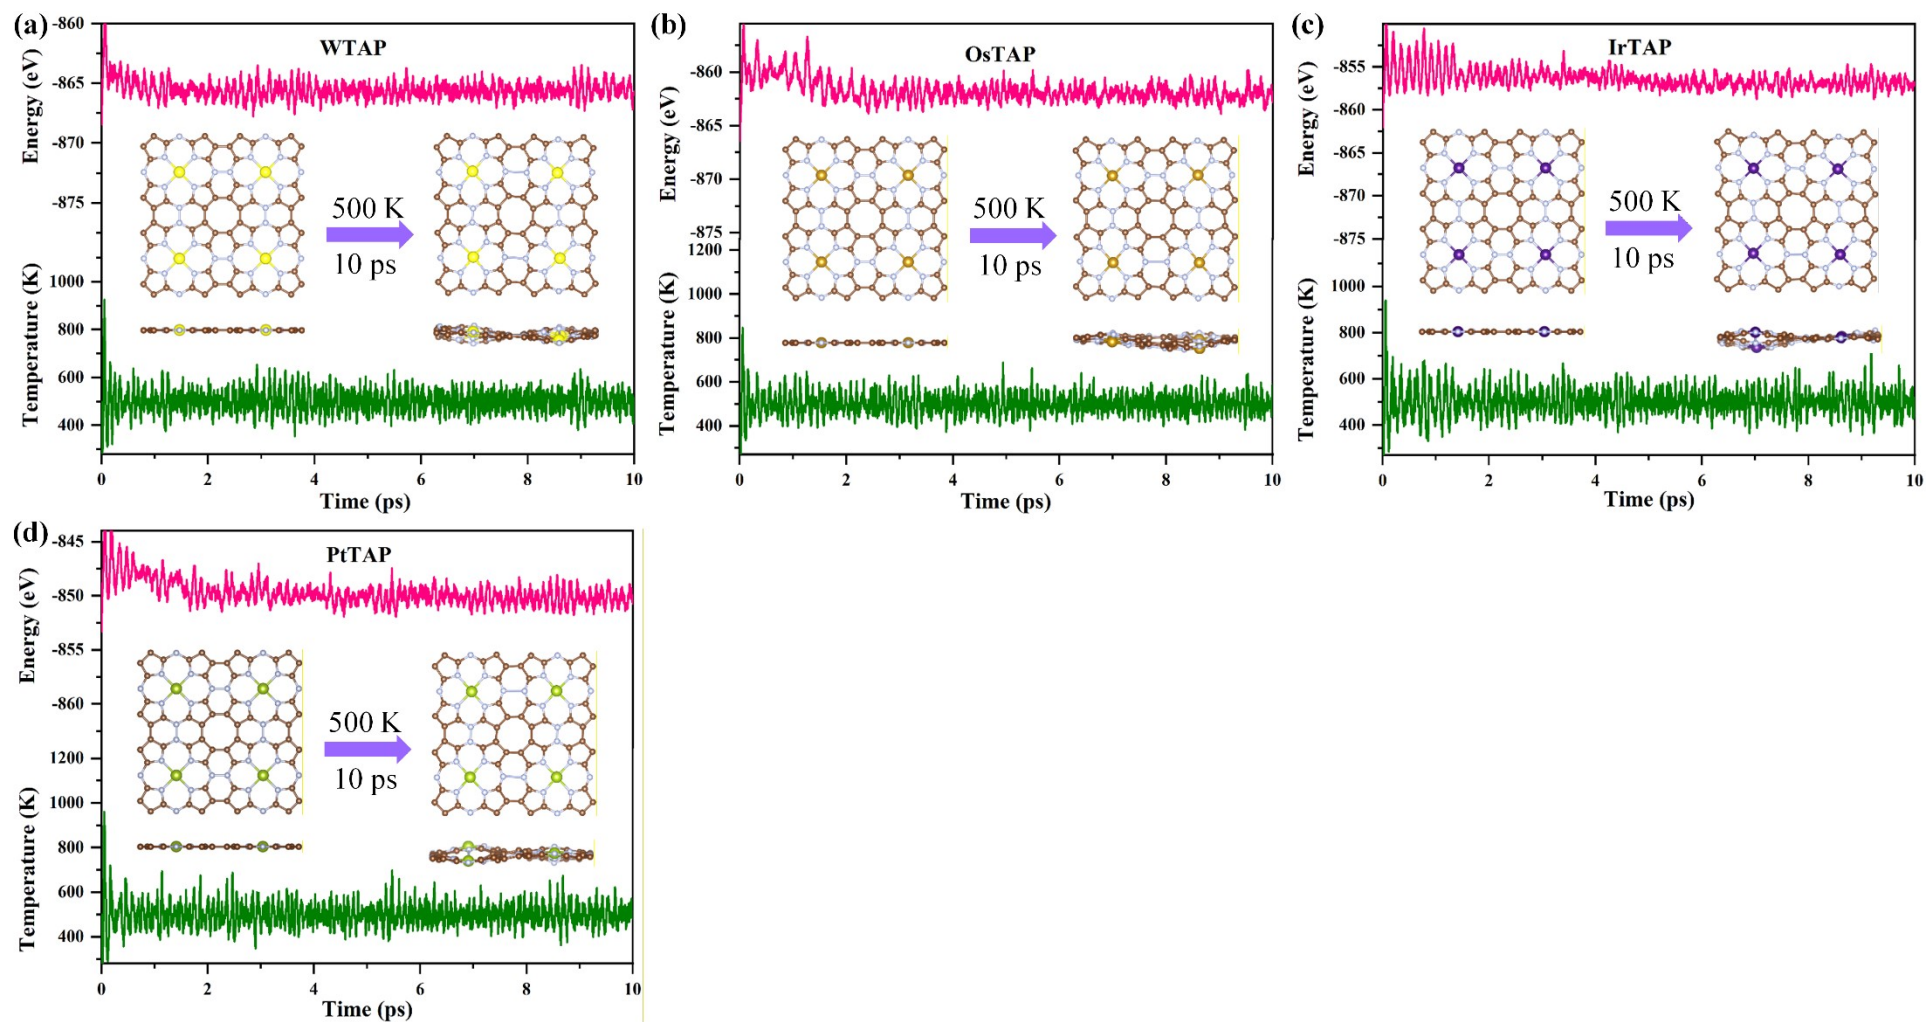

**Figure S3.** Evolution of the temperatures and total energies of AIMD simulations for (a) WTAP, (b) ReTAP, (c) OsTAP, (d) IrTAP, and (e) PtTAP at 500 K for 10 ps with a time step of 2 fs. The illustrations are snapshots of the initial and final frame during AIMD simulations.

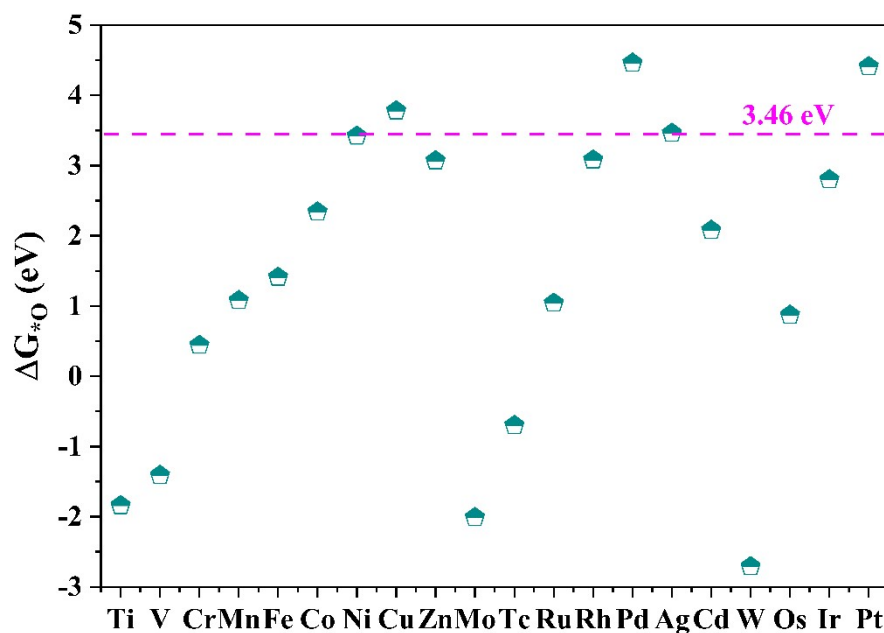

**Figure S4.** Calculated  $\Delta G_{*O}$  values of the 20 stable SACs. The horizontal dotted line is  $\Delta G_{*O} = \Delta G_{H_2O_2} - \Delta G_{H_2O} = 3.46$  eV.

**Table S3.** Summary Table of Benchmarking SACs.

| Catalyst                            | Support                                                                                               | Reaction | Overpotential (V) | Literature                                                    |
|-------------------------------------|-------------------------------------------------------------------------------------------------------|----------|-------------------|---------------------------------------------------------------|
| MnPor                               | metalloporphyrinoid (MPor)                                                                            | ORR      | 0.56              | <i>Rare Met.</i> 2025, 44, 3920–3933                          |
| Fe-Pc                               | Phthalocyanine (Pc)                                                                                   | ORR      | 0.45              | <i>Int. J. Hydrogen Energy</i> 2024, 88, 850–857              |
| Mn <sub>3</sub> (HHTP) <sub>2</sub> | 2,3,6,7,10,11-hexahydroxytriphenylene (HHTP)                                                          | ORR/OER  | 0.44/0.53         | <i>J. Phys. Chem. C</i> 2025, 129 (31), 14002–14010           |
| Rh <sub>3</sub> (HADQ) <sub>2</sub> | 2,3,6,7,10,11-hexamine (C <sub>12</sub> H <sub>12</sub> N <sub>12</sub> ) pyrazine quinoxaline (HADQ) | ORR/OER  | 0.31/0.31         | <i>Langmuir</i> 2025, 41 (1), 745–754                         |
| Cu@g-C <sub>4</sub> N <sub>3</sub>  | g-C <sub>4</sub> N <sub>3</sub>                                                                       | ORR      | 0.70              | <i>ACS Appl. Mater. Interfaces</i> 2024, 16 (14), 17617–17625 |
| Co@C <sub>3</sub> N <sub>2</sub>    | C <sub>3</sub> N <sub>2</sub>                                                                         | HER      | 0.12              | <i>New J. Chem.</i> 2025, 49, 1672–1685                       |
| Mn <sub>12</sub> C <sub>12</sub>    | carbon layer                                                                                          | HER      | 0.09              | <i>Int. J. Hydrogen Energy</i> 2025, 144, 1043–1050           |
| ZnTAP                               | TAP                                                                                                   | ORR      | 0.43              | <i>This work</i>                                              |
| RhTAP                               | TAP                                                                                                   | OER      | 0.58              | <i>This work</i>                                              |
| CdTAP                               | TAP                                                                                                   | HER      | 0.08              | <i>This work</i>                                              |

**Table S4.** The adsorption free energies of \*OOH ( $\Delta G_{*OOH}$ ), \*O ( $\Delta G_{*O}$ ), and \*OH ( $\Delta G_{*OH}$ ) on TMTAP.

| TMTAP | $\Delta G_{*OOH}$<br>(eV) | $\Delta G_{*O}$<br>(eV) | $\Delta G_{*OH}$<br>(eV) |
|-------|---------------------------|-------------------------|--------------------------|
| Ti    | 1.91                      | -1.84                   | -1.66                    |
| V     | 1.22                      | -1.41                   | -0.54                    |
| Cr    | 3.70                      | 0.44                    | 0.48                     |
| Mn    | 3.85                      | 1.08                    | 0.66                     |
| Fe    | 3.80                      | 1.41                    | 0.76                     |
| Co    | 4.40                      | 2.34                    | 1.50                     |
| Ni    | 4.94                      | 3.42                    | 1.95                     |
| Cu    | 4.85                      | 3.78                    | 2.00                     |
| Zn    | 4.02                      | 3.07                    | 0.80                     |
| Mo    | -0.34                     | -2.01                   | -0.46                    |
| Tc    | 1.78                      | -0.70                   | -0.02                    |
| Ru    | 3.54                      | 1.04                    | 0.79                     |
| Rh    | 4.89                      | 3.08                    | 1.78                     |
| Pd    | 5.13                      | 4.46                    | 2.46                     |
| Ag    | 4.55                      | 3.46                    | 7.42                     |
| Cd    | 2.91                      | 2.08                    | -0.36                    |
| W     | -1.58                     | -2.71                   | -0.98                    |
| Re    | 0.84                      | -1.45                   | -0.30                    |
| Os    | 3.33                      | 0.87                    | 0.95                     |
| Ir    | 4.88                      | 2.80                    | 1.80                     |
| Pt    | 5.13                      | 4.41                    | 2.46                     |

**Table S5.** The bond length of adsorbed O<sub>2</sub> molecule (Å), magnetic moment of TM atom ( $\mu_B$ ) before and after O<sub>2</sub> adsorption for Fe-, Zn-, Rh-, and AgTAP catalysts.

| TMTAP | Bond length of<br>adsorbed O <sub>2</sub> molecule | Magnetic moment of<br>TM atom before O <sub>2</sub><br>adsorption | Magnetic moment of<br>TM atom after O <sub>2</sub><br>adsorption |
|-------|----------------------------------------------------|-------------------------------------------------------------------|------------------------------------------------------------------|
| Fe    | 1.29                                               | 1.72                                                              | 1.87                                                             |
| Zn    | 1.30                                               | 0                                                                 | 0.01                                                             |
| Rh    | 1.27                                               | 0                                                                 | 0.32                                                             |
| Ag    | 1.27                                               | 0.42                                                              | 0.12                                                             |

**Table S6.** Calculated Bader charges on TM and O atoms, magnetic moment of O atom ( $\mu_B$ ) after O<sub>2</sub> adsorption for Fe-, Zn-, Rh-, Ag-, Ti-, Mo-, and W-TAP catalysts.

| TMTAP | TM       | O        | Magnetic moment of O |
|-------|----------|----------|----------------------|
| Fe    | -1.13  e | +0.22  e | 0.63                 |
| Zn    | -1.26  e | +0.25  e | 0.56                 |
| Rh    | -0.77  e | +0.15  e | 0.70                 |
| Ag    | -0.69  e | +0.13  e | 0.68                 |
| Ti    | -1.65  e | +0.48  e | 0.01                 |
| Mo    | -1.54  e | +0.47  e | 0                    |
| W     | -1.76  e | +0.49  e | 0.01                 |

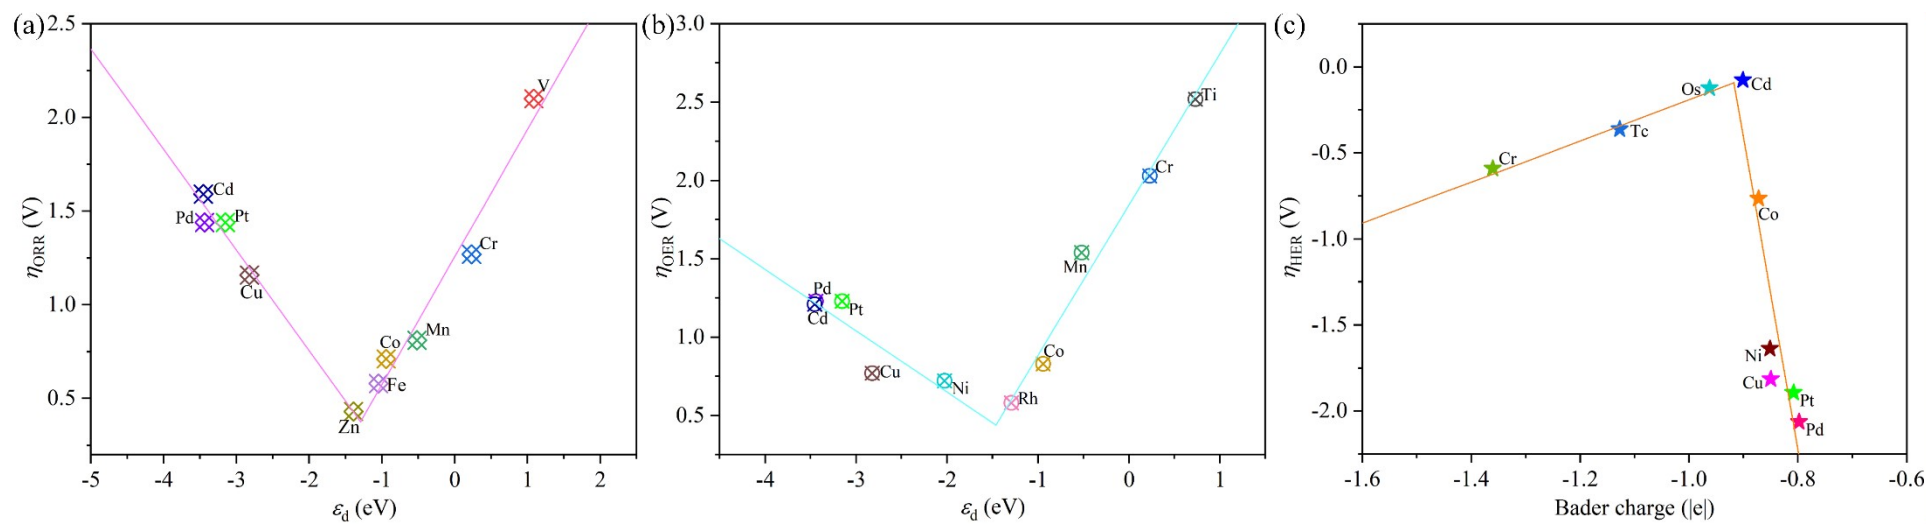

**Figure S5.** Volcano plot of the  $\eta_{\text{ORR}}$  as a function of the d-band center ( $\epsilon_d$ ). (b) Volcano plot of the  $\eta_{\text{OER}}$  as a function of the d-band center ( $\epsilon_d$ ). (c) Volcano plot of the  $\eta_{\text{HER}}$  as a function of the Bader charge.

## References

- [1] Kittel, C., *Introduction to solid state physics*. Wiley, Hoboken, **2005**.
- [2] Landolt–Bornstein, N. D., *Functional Relationships in Science and Technology*. Springer, Berlin, **1982**.
